# Supplementary material
Source: PubMed Central journal article supplement (PMC6857036)
Supplement: DS1_VET_10.1177_0300985819852138.pdf [file DS1_VET_10.1177_0300985819852138.pdf]

*Veterinary Pathology: Supplemental Materials*  
 Janke et al. Immunophenotyping of murine precursor B-cell leukemia/lymphoma:  
 a comparison of immunohistochemistry and flow cytometry.

**Supplemental Table S1.** Experimental details of mouse cohort.

| <b>Case #</b> | <b>Sex</b> | <b>Genotype</b> | <b>Mutagenesis</b> | <b>Enlarged Spleen</b> | <b>Enlarged Lymph Nodes</b> | <b>Enlarged Liver</b> |
|---------------|------------|-----------------|--------------------|------------------------|-----------------------------|-----------------------|
| 1             | F          | Pax5+/-         | MMLV               | Y                      | Y                           | N                     |
| 2             | M          | Pax5+/-         | MMLV               | Y                      | Y                           | N                     |
| 3             | M          | Pax5+/-         | MMLV               | Y                      | Y                           | N                     |
| 4             | F          | Pax5+/-         | MMLV               | Y                      | Y                           | N                     |
| 5             | F          | Pax5+/-         | ENU                | Y                      | Y                           | Y                     |
| 6             | M          | Pax5+/-         | MMLV               | Y                      | Y                           | N                     |
| 7             | F          | Pax5+/-         | MMLV               | Y                      | Y                           | Y                     |
| 8             | M          | Pax5+/-         | ENU                | Y                      | N                           | N                     |
| 9             | F          | Pax5+/-         | ENU                | Y                      | Y                           | Y                     |
| 10            | F          | Pax5+/-         | ENU                | Y                      | Y                           | Y                     |
| 11            | M          | wt              | MMLV               | Y                      | N                           | N                     |
| 12            | F          | Pax5+/-         | ENU                | Y                      | Y                           | N                     |
| 13            | M          | Pax5+/-         | MMLV               | Y                      | Y                           | N                     |
| 14            | F          | Pax5+/-         | MMLV               | Y                      | Y                           | N                     |
| 15            | M          | Pax5+/-         | MMLV               | Y                      | Y                           | N                     |
| 16            | M          | Pax5+/-         | ENU                | Y                      | N                           | N                     |
| 17            | F          | Pax5+/-         | ENU                | Y                      | Y                           | N                     |
| 18            | F          | Pax5+/-         | ENU                | Y                      | Y                           | N                     |
| 19            | F          | Pax5+/-         | ENU                | Y                      | Y                           | N                     |
| 20            | M          | Pax5+/-         | MMLV               | Y                      | Y                           | N                     |
| 21            | M          | wt              | MMLV               | Y                      | Y                           | N                     |
| 22            | F          | wt              | MMLV               | Y                      | Y                           | N                     |
| 23            | M          | Pax5+/-         | ENU                | Y                      | Y                           | N                     |
| 24            | F          | wt              | MMLV               | Y                      | Y                           | N                     |
| 25            | F          | Pax5+/-         | MMLV               | Y                      | Y                           | N                     |
| 26            | M          | Pax5+/-         | MMLV               | Y                      | N                           | N                     |
| 27            | F          | Pax5+/-         | ENU                | Y                      | Y                           | Y                     |
| 28            | M          | Pax5+/-         | ENU                | Y                      | Y                           | N                     |
| 29            | F          | Pax5+/-         | MMLV               | Y                      | Y                           | N                     |
| 30            | F          | Pax5+/-         | MMLV               | Y                      | Y                           | N                     |

*Veterinary Pathology*: Supplemental Materials

Janke et al. Immunophenotyping of murine precursor B-cell leukemia/lymphoma:  
a comparison of immunohistochemistry and flow cytometry.

Supplemental Table S2. Primary antibodies, cellular localization, external positive control, type, concentration, supplier and technical procedures for visualization

| Antibody        | Cellular localization  | External positive control | Type              | Dilution | Epitope Retrieval     | Link                         | Supplier                     |
|-----------------|------------------------|---------------------------|-------------------|----------|-----------------------|------------------------------|------------------------------|
| c-Kit/<br>CD117 | Membrane/<br>cytoplasm | Mast cells                | Goat polyclonal   | 1:1000   | CC1 <sup>a</sup>      | OM GT <sup>b</sup>           | R&D Systems, AF1356          |
| TdT             | Nucleus                | Thymus                    | Rabbit polyclonal | 1:250    | ER2 <sup>c</sup>      | RB-RF <sup>d</sup>           | Supertechs, 004              |
| CD43            | Membrane/<br>cytoplasm | Spleen                    | Rat monoclonal    | 1:25     | ER1 <sup>e</sup>      | RT-RF <sup>f</sup>           | PharMingen, 552366           |
| PAX5            | Nucleus                | Spleen                    | Rabbit monoclonal | 1:1000   | ER2 <sup>c</sup>      | RB-RF <sup>d</sup>           | Abcam, ab109443              |
| B220            | Membrane               | Spleen                    | Rat monoclonal    | 1:8000   | ER2 <sup>c</sup>      | RB-RT <sup>g</sup>           | PharMingen, 553084           |
| IgM             | Membrane/<br>cytoplasm | Spleen                    | Rat monoclonal    | 1:800    | TR PC110 <sup>h</sup> | RB-RT <sup>g</sup>           | PharMingen, 553435           |
| KLC             | Membrane/<br>cytoplasm | Spleen                    | Goat polyclonal   | 1:2500   | None                  | OM GT <sup>b</sup>           | Southern Biotech,<br>1050-01 |
| CD3             | Membrane/<br>cytoplasm | Thymus                    | Goat polyclonal   | 1:1000   | CC1 <sup>a</sup>      | RB-GT/<br>OM RB <sup>i</sup> | SantaCruz, sc-1127           |
| MPO             | Cytoplasm              | Bone<br>marrow            | Rabbit polyclonal | 1:1200   | CC1 <sup>a</sup>      | OM RB <sup>j</sup>           | DAKO, A0398                  |

<sup>a</sup> Heat-induced epitope retrieval, Cell Conditioning media 1 (Ventana Medical Systems, Tucson, AZ)

<sup>b</sup> Detection by DISCOVERY OmniMap anti-goat HRP (Ventana Medical Systems)

<sup>c</sup> Heat-induced epitope retrieval, Epitope Retrieval solution 2 Bond (ER2, Leica Biosystems, Buffalo Grove, IL)

<sup>d</sup> Detection by anti-rabbit Bond Polymer Refine Detection (Leica Biosystems)

<sup>e</sup> Heat-induced epitope retrieval, Epitope Retrieval solution 1 Bond (ER1, Leica Biosystems, Buffalo Grove, IL)

<sup>f</sup> Detection by anti-rat Bond Polymer Refine Detection (Leica Biosystems)

<sup>g</sup> Detection by rabbit anti-rat secondary antibody (1:400, Vector Laboratories)

<sup>h</sup> Heat-induced epitope retrieval with Target Retrieval (DAKO, Santa Clara, CA)

<sup>i</sup> Detection by rabbit anti-goat secondary antibody (1:400, Vector Laboratories) followed by DISCOVERY OmniMap anti-rabbit HRP (Ventana Medical Systems)

<sup>j</sup> Detection by DISCOVERY OmniMap anti-rabbit HRP (Ventana Medical Systems)
